# Supplementary material
Source: publisher figshare collection journal article supplement (https://acs.figshare.com/ndownloader/files/8598898)
Supplement: Supplementary file 1 [file 8598898]

## **Supporting information**

# **Specifically increased paclitaxel release in tumor and synergetic therapy by a hyaluronic acid-tocopherol nanomicelle**

*Hanbo Zhang, Wei Li, Xiaomeng Guo, Fenfen Kong, Zuhua Wang, Chunqi Zhu, Lihua*

*Luo, Qingpo Li, Jie Yang, Yongzhong Du, and Jian You\**

College of Pharmaceutical Sciences, Zhejiang University, 866 Yuhangtang Road,  
Hangzhou, Zhejiang 310058, P. R. China

\* Corresponding Author:

Jian You, College of Pharmaceutical Sciences, Zhejiang University, 866 Yuhangtang  
Road, Hangzhou 310058, Zhejiang, China. Office: 086-571-88208443 Fax:  
086-571-88208439 Email: youjiandoc@zju.edu.cn.

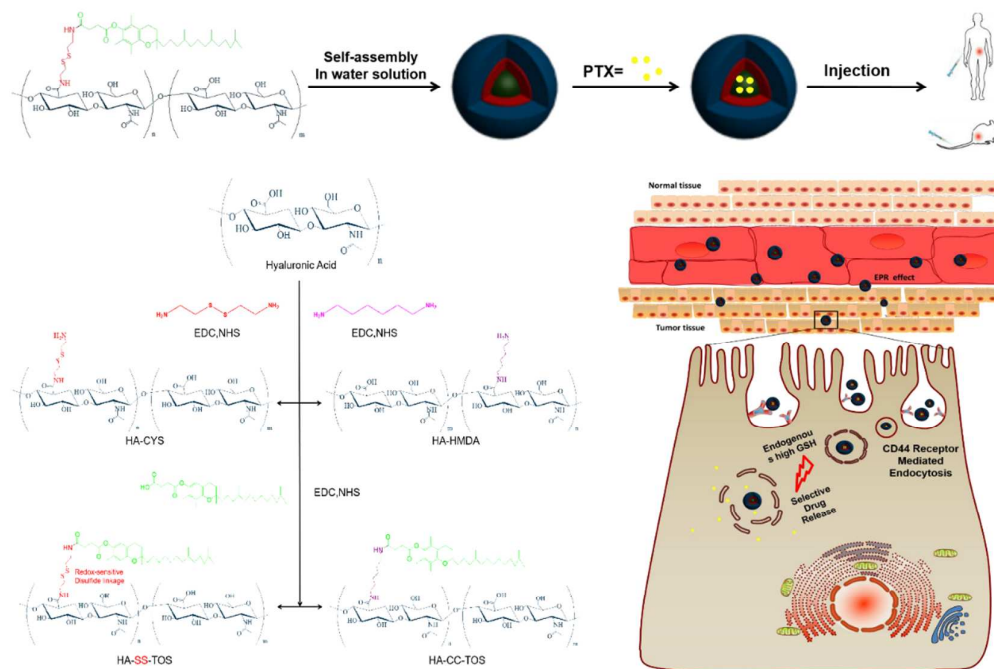

Figure S1. Synthesis of HA-SS-TOS and HA-CC-TOS.

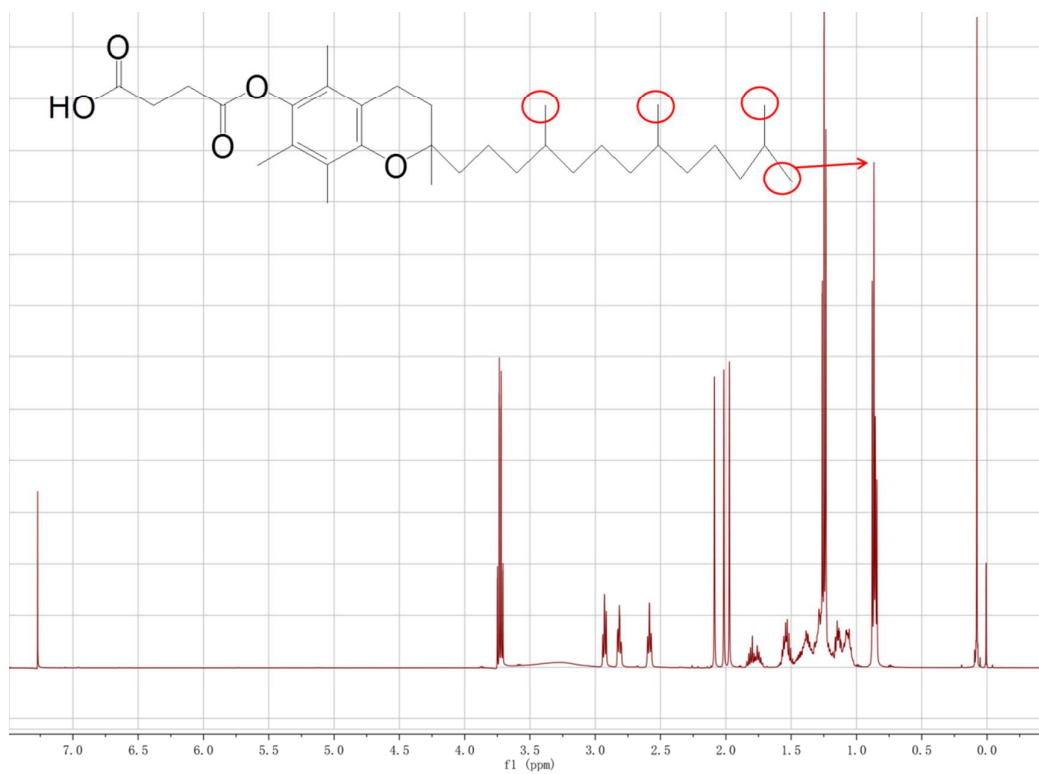

Figure S2.  $^1\text{H}$  NMR of TOS. The peak at  $\sim 0.95$  ppm belongs to the proton of the methyl hydrogen in TOS (12H,  $-\text{CH}(\text{CH}_3)-\text{CH}_3$  and  $-\text{CH}_2\text{CH}-(\text{CH}_3)-\text{CH}_3$ ).

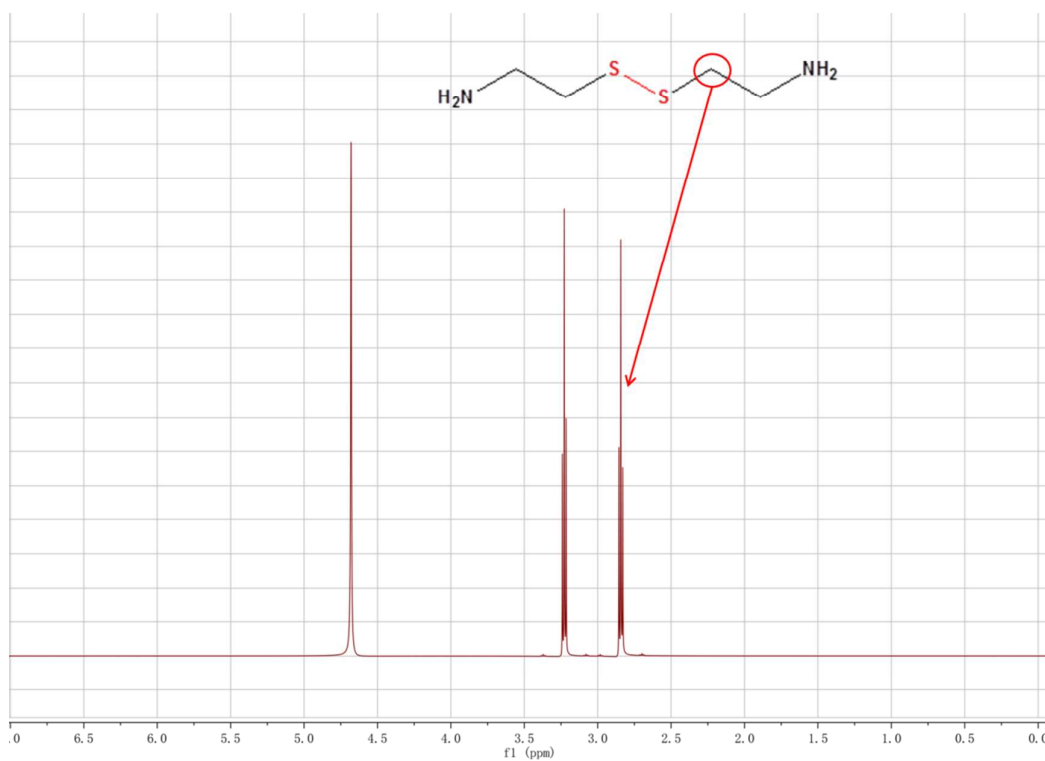

Figure S3.  $^1\text{H}$  NMR of cystamine. The peak at  $\sim 2.87$  ppm belongs to the proton of the methylene hydrogen in cystamine (2H,  $-\text{CH}_2-\text{CH}_2-\text{NH}_2$ ).

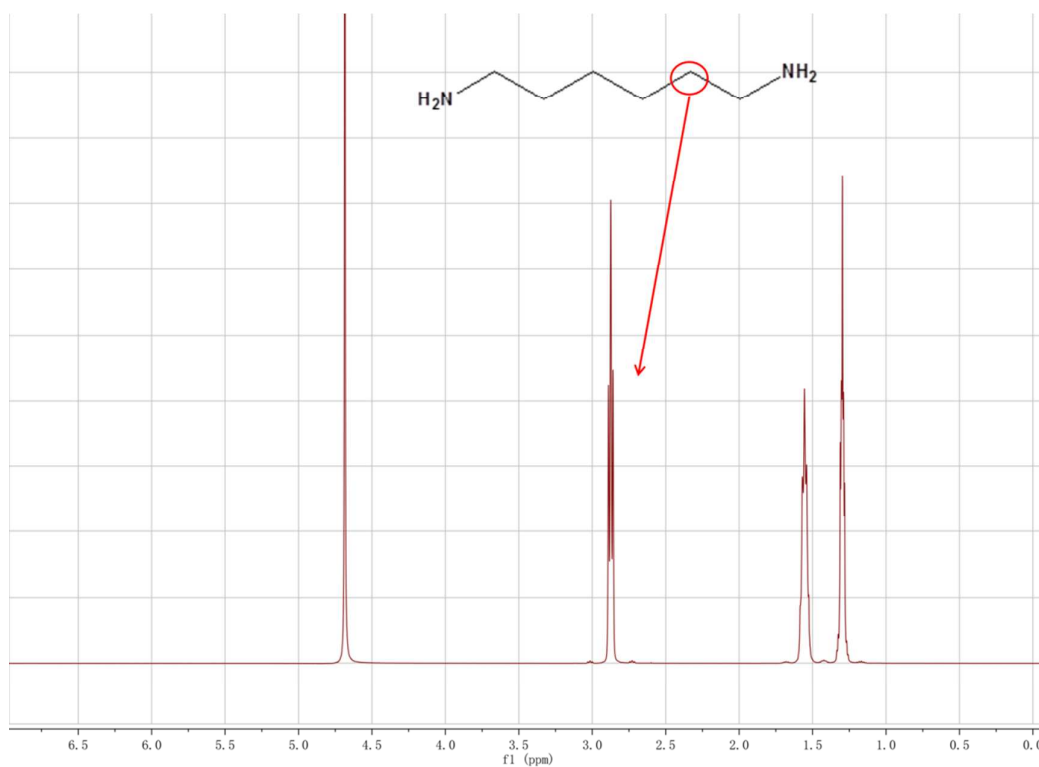

Figure S4.  $^1\text{H}$  NMR of 1,6-Diaminohexane. The peak at  $\sim 2.89$  ppm belongs to proton of the methylene hydrogen in 1,6-diaminohexane (2H,  $\text{-CH}_2\text{-CH}_2\text{-NH}_2$ ).

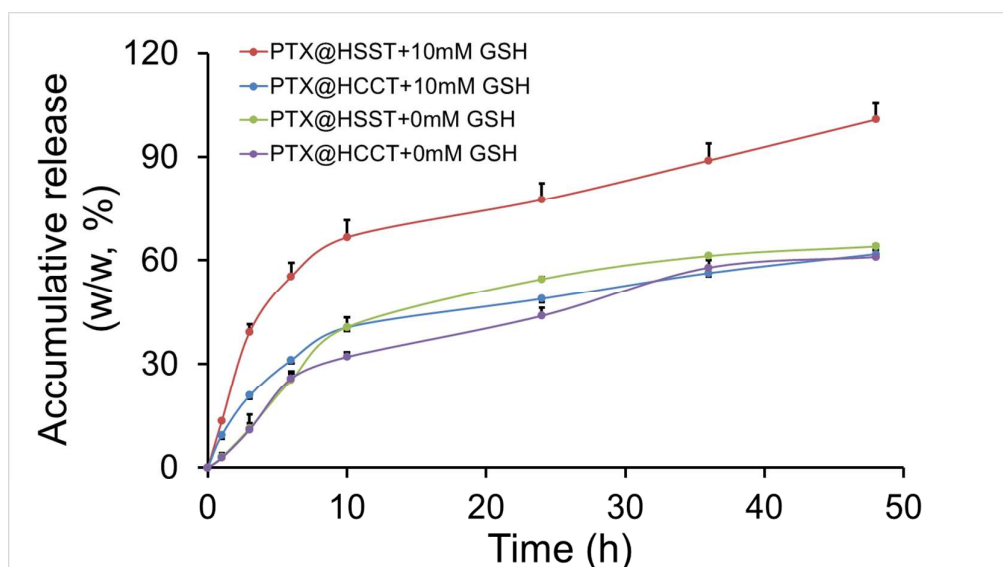

Figure S5. GSH triggered the release of PTX from PTX-loaded HSST (PTX@HSST) and HCCT (PTX@HCCT) micelles within 48 hours ( $n = 3$ ).

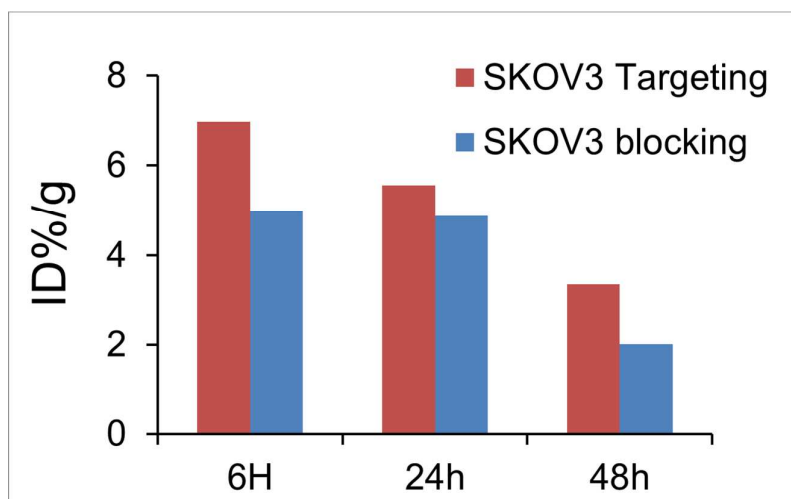

Figure S6. %ID/g (the percentage of the injected dose per gram of tissue) was analyzed to show the accumulation of ICG-HSST in the SKOV3 tumor-targeting group and SKOV3 tumor-blocking group at 6, 24, 48 hours after the i.v. injection of ICG-HSST

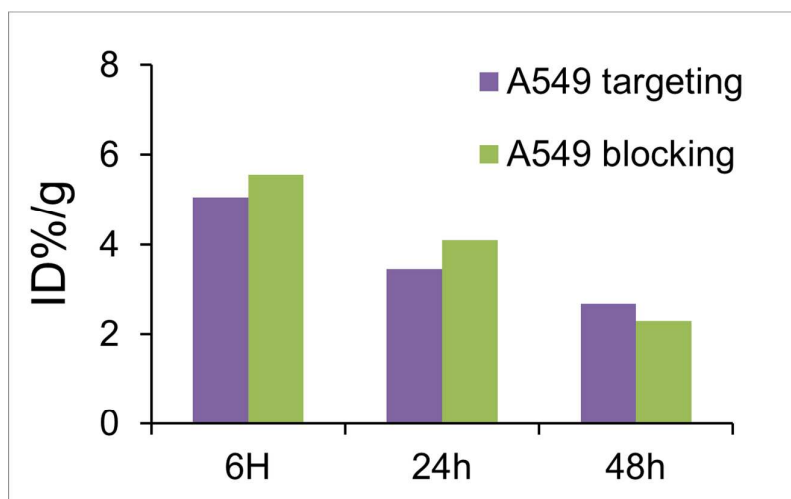

Figure S7. %ID/g (the percentage of the injected dose per gram of tissue) was analyzed to show the accumulation of ICG-HSST in the A549 tumor-targeting group and A549 tumor-blocking group at 6, 24, 48 hours after the i.v. injection of ICG-HSST.
